# Supplementary material for: Nrf2 signaling activation by a small molecule activator compound 16 inhibits hydrogen peroxide-induced oxidative injury and death in osteoblasts
Source: PubMed Central journal article supplement (PMC9360014; doi:10.1038/s41420-022-01146-7), 2022-08-08

# Figure S1. The uncropped blotting images of the study.

## Figure 1.

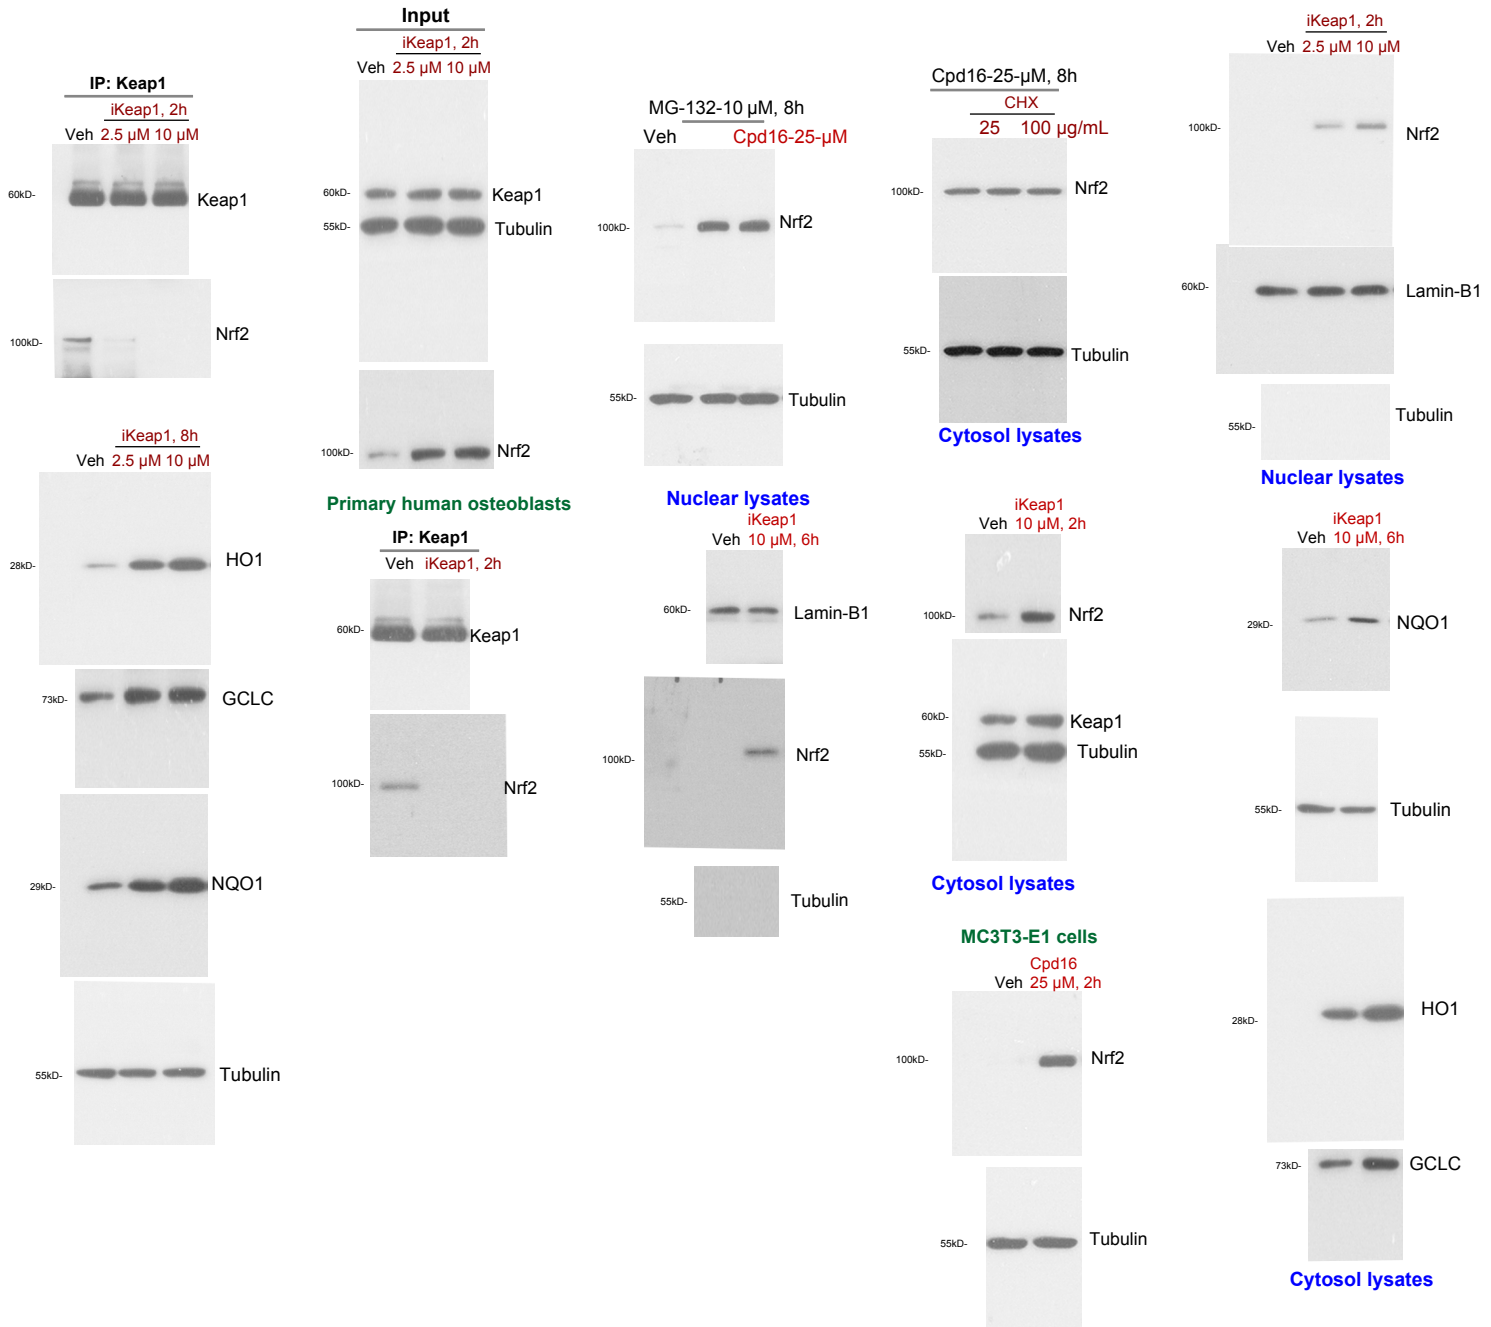

**Figure 3.**

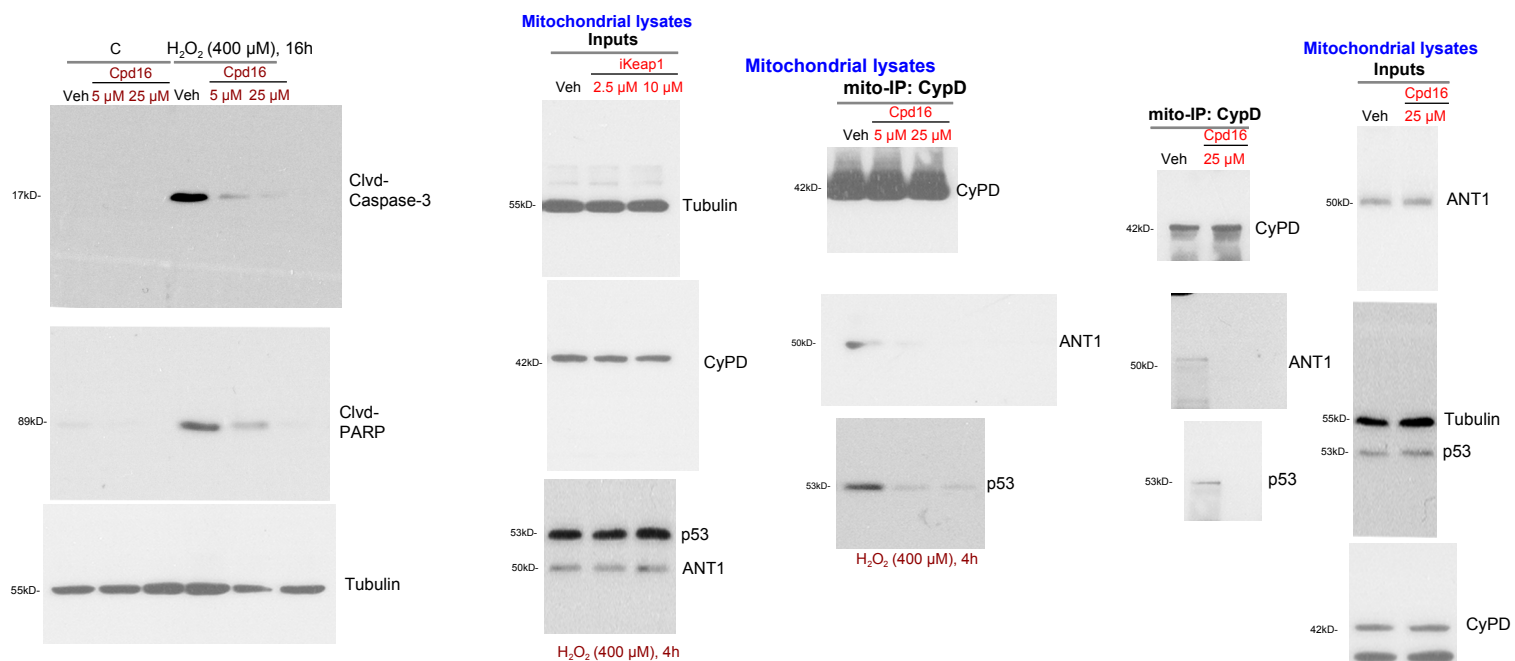

**Figure 6.**

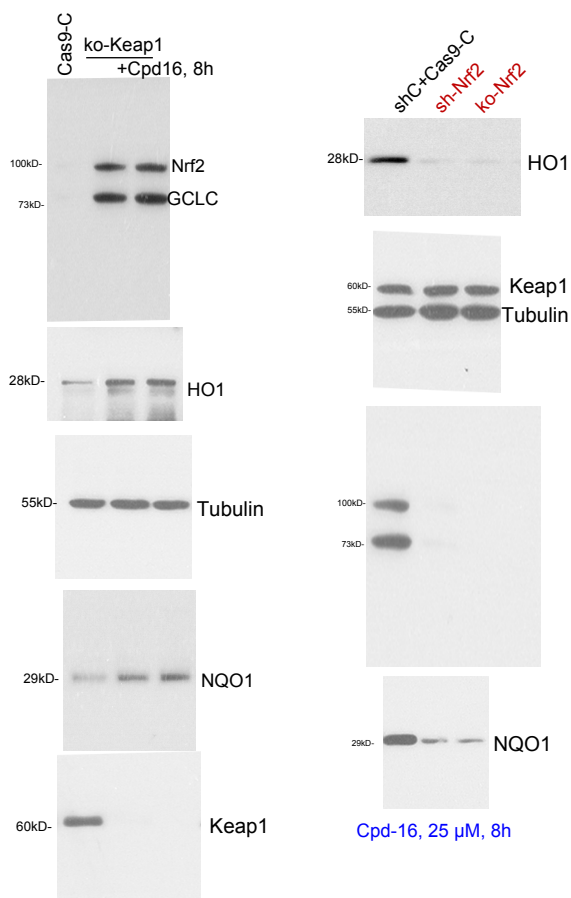

**Figure 7.**

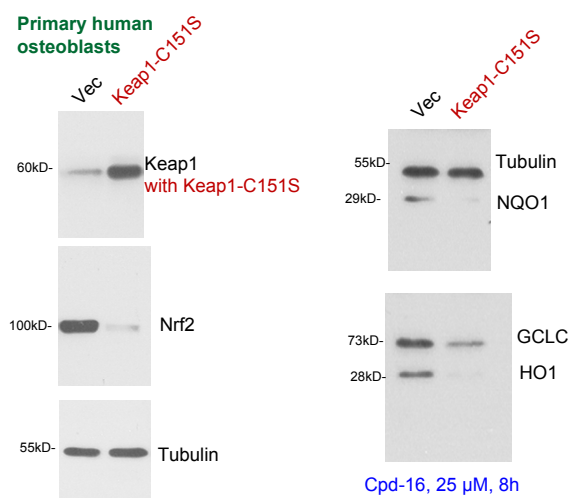

Supplement: 41420_2022_1146_MOESM1_ESM.pdf [file 41420_2022_1146_MOESM1_ESM.pdf]
